1           **The Dawn is Coming —— the Description and Prediction of Omicron**  
2           **SARSCoV-2 Epidemic Outbreak in Shanghai by Mathematical Modeling**

3   Minghao Jiang<sup>1,\*</sup>, Guoyu Meng<sup>1,\*,#</sup>, Geng Wu<sup>2,\*,#</sup>

4   <sup>1</sup>Shanghai Institute of Hematology, State Key Laboratory of Medical Genomics,  
5   National Research Center for Translational Medicine, Rui-Jin Hospital, Shanghai Jiao  
6   Tong University School of Medicine and School of Life Sciences and Biotechnology,  
7   Shanghai Jiao Tong University, 197 Ruijin Er Road, Shanghai 200025, China

8   <sup>2</sup>State Key Laboratory of Microbial Metabolism, School of Life Science and  
9   Biotechnology, The Joint International Research Laboratory of Metabolic &  
10   Developmental Sciences, Shanghai Jiao Tong University, Shanghai, China

11   \* equal contribution

12   #corresponding authors

13   E-mail: [guoyumeng@shsmu.edu.cn](mailto:guoyumeng@shsmu.edu.cn); [geng.wu@sjtu.edu.cn](mailto:geng.wu@sjtu.edu.cn)

14   Tel: 0086 (0) 2164370045-610730

15   Fax: 0086 (0) 2164743206

16   **KEYWORDS:** SARS-CoV-2 Omicron, Shanghai outbreak, Prediction model

17

18

## 19 **Abstract**

20 The COVID-19 Omicron outbreak in Shanghai has been going on for >1 month and 25  
21 million population is subjected to strict lock-down quarantine. Until now, it is not clear  
22 how long this epidemic might end. Here, we present a time-delayed differentiation  
23 equation model to evaluate and forecast the spreading trend. Our model provides  
24 important parameters such as the average quarantine ratio, the detection interval from  
25 being infected to being tested positive, and the spreading coefficient to better  
26 understand the omicron progression. After data fitting, we concluded on 11 April that  
27 the maximum overall number infected in Shanghai would exceed 300,000 on 14 April  
28 and the turning point would be in the coming days around 13-15 April, 2022, which is  
29 perfectly in line with the real-life infection number. Furthermore, the quarantine ratio  
30 in Shanghai was found to be greater than 1, supportive of the effectiveness of the strict  
31 lockdown policy. Altogether, our mathematical model helps to define how COVID-19  
32 epidemic progresses under the Shanghai lock-down unprecedented in human history  
33 and the Chinese zero tolerance policy.

34

## 35 **Introduction**

36 The SARS-CoV-2 Omicron variant, reported as a new variant of COVID-19 in  
37 November, 2021<sup>1</sup>, has broken out in Shanghai recently. This variant carries mutations  
38 to help the virus to resist or escape immunity provided by COVID-19 vaccines<sup>1-3</sup>. To  
39 prevent the spread of infection, the local government of Shanghai municipal decided to  
40 enforce a practical lockdown on 28 March. However, in the past one and a half weeks,

41 there were still over 20,000 Omicron cases confirmed per day, including both diagnosed  
42 and asymptomatic. The situation was quite severe when compared to other places across  
43 mainland China during the same period or that in Shanghai several months ago. Here,  
44 we propose a new mathematical model to evaluate the epidemic trend of Omicron  
45 spreading in Shanghai and make forecasts for the near future.

46

## 47 **Results**

48 The Omicron epidemic in Shanghai has begun since early March, 2022. Until 12  
49 March, the number of confirmed cases per day did not exceed 100 (**Extended Data Fig.**  
50 **1**). Due to the surge in COVID-19 positives since mid-March, the Shanghai municipal  
51 government made the practical lockdown decision on March 28 to control the spread.

52 We obtained a time-delayed differential equation to describe the spreading of  
53 COVID-19 Omicron (**Fig. 1**):

$$54 \quad \frac{dp(t)}{dt} = k \cdot [p(t) - u \cdot p(t - \tau)]$$

55 In the above equation,  $p(t)$  is the total number of patients infected at time  $t$ . The  
56 average spreading coefficient  $k$  represents the average number of people one  
57 unquarantined patient can infect in a unit interval. The average quarantine ratio  $u$  is  
58 defined as the number of quarantined patients divided by the number of people showing  
59 nucleic acid positive at time  $t$ . The average detection interval  $\tau$  is the average time  
60 interval from being infected to being tested positive.

61 We fitted the data of total number of reported cases before and after 28 March to  
62 our equation above, in order to figure out to what extent the more stringent policy could

63 affect. We found that the fitting between the reported data and the curve calculated from  
64 our equation was quite close (**Fig. 2**). We found that, in order to fit the data better, it  
65 was needed to alter the parameter  $\tau$  in the two scenarios: i)  $\tau = 2$  (days) before the  
66 city lockdown and ii)  $\tau = 1$  (day) after the city lockdown. This can be construed as  
67 that the more stringent quarantine policy after the city lockdown, with nucleic acid tests  
68 for all citizens once or twice per day, reduced the detection interval  $\tau$ .

69 In addition, we found that the spreading coefficient  $k$  decreased after the city  
70 lockdown, from 1.63 to 1.49, approximately (**Fig. 2**). Furthermore, in the early stage of  
71 the epidemic, the quarantine ratio  $u$  was  $1.32 > 1$ , which means that almost all the  
72 patients tested positive as well as their close contacts were quarantined. In the later  
73 stage of the epidemic, the quarantine ratio  $u$  became smaller,  $\sim 1.04$ . The reduced  $u$   
74 may serve as a sign of the arrival of the turning point. Since  $p(t)$ , the cumulative  
75 number of confirmed cases, is a non-decreasing function, its derivative,  $\frac{dp(t)}{dt}$ , has to be  
76 greater than or equal to 0. Therefore, from our equation,  $u$  must be smaller than or  
77 equal to  $\frac{p(t)}{p(t-\tau)}$ . At the beginning of the epidemic, Omicron was spreading quickly,  
78  $p(t)$  was much larger than  $p(t-\tau)$ , so  $u$  was relatively bigger. When the turning  
79 point was getting close, Omicron spreading was slowed down, thus  $p(t)$  was not much  
80 different from  $p(t-\tau)$ ,  $\frac{p(t)}{p(t-\tau)}$  was close to 1, which made the quarantine ratio  $u$   
81 smaller than that in the early stage of the epidemic.

82 With the three parameters estimated, the trend of Omicron spreading in the near  
83 future was predicted. We concluded that there will be more than 300,000 people  
84 infected in Shanghai during this Omicron outbreak (**Fig. 3a**). Most importantly, we

85 predicted that the number of confirmed cases per day would start to decrease around  
86 April 13 (**Fig. 3b**), which was the so-called turning point.

87 We found that the average detection interval  $\tau$  was 1 or 2 days when fitting the  
88 known data, which means that, there would be 1 to 2 days of delay from infection to  
89 showing positive in the nucleic acid test, during which time the unnoticed patients were  
90 still infectious<sup>4-6</sup>. We believe that this is one of the major reasons why Omicron spread  
91 rapidly. Furthermore, the average quarantine ratio  $u$  was found to be greater than 1,  
92 which means that most of the infected patients and their close contacts had been  
93 quarantined, indicating that the lockdown and other stringent policies were effective,  
94 making appearance of the turning point and quelling the epidemic possible.

95 Moreover, the apparent  $R_0$  value, which is the number of people a patient could  
96 infect, could be obtained by multiplying the spreading coefficient  $k$  and the detection  
97 interval  $\tau$ . After the lockdown, the value of  $R_0$  dropped from 3.27 to 1.49, providing  
98 further supporting evidence for the effectiveness of the lockdown.

99 We finished the forecast on April 10. Before our manuscript is submitted, the  
100 numbers of daily infected patients before April 17 were collected to check our  
101 prediction (**Supplementary Table 2**). Strikingly, it turned out that the real turning point  
102 indeed appeared on 13 April, showing exact concordance with our prediction.

103

## 104 **Discussion**

105 The sudden Omicron epidemic outbreak in Shanghai has brought panic to the  
106 public, and great loss to business. In order to evaluate and forecast the spreading trend

107 based on available confirmed data, we proposed a novel mathematical model, which  
108 took the Chinese government policy (such as frequent nucleic acid tests and isolating  
109 those showing nucleic acid positive as well as their close contacts) into account, which  
110 could provide us important parameters describing the Omicron epidemic such as the  
111 spreading coefficient  $k$ , the quarantine ratio  $u$ , and the detection interval  $\tau$ . The  
112 predicted number of overall cases and the expected time of turning point may help the  
113 government to make judgment on the spreading and to revise the policies accordingly.

114 Although our mathematical model is forged based on China's anti-epidemic  
115 strategies which rely heavily on quarantine, it is also applicable to other countries  
116 (including western countries) in the world. Compared to western countries relying on  
117 the formation of herd immunity and mRNA vaccines which reduce the average  
118 spreading coefficient  $k$ , China attempts to boost the average quarantine ratio  $u$  to get  
119 the epidemic under control.

120 Our model is easy to be applied to describe the spreading of other epidemic diseases,  
121 and can help the society to avoid panic and build up confidence to fight against COVID-  
122 19. For example, the Guangzhou city was the latest metropolitan city in China that  
123 declared city-wise lockdown on Apr 11. We believe that our mathematical model  
124 presented in this report would help the public to have a better grasp of the current  
125 pandemic spread, and would undoubtedly instill confidence and calm that are urgently  
126 needed in the caught-up fight of COVID-19 in China.

127

128 **Materials and methods**

129 **Data used in modeling**

130 The case numbers were collected manually from officially released reports  
131 (Supplementary Table 1).

132

133 **Mathematical modeling**

134 First, a differential equation was deduced to describe the spreading of COVID-19 as  
135 following. Let us denote  $s(t)$  as the number of people whose nucleic acid tests are  
136 positive, then

137 
$$s(t) = p(t - \tau)$$

138 in which  $p(t)$  is the total number of patients infected at time  $t$ , and  $\tau$  is the time  
139 interval from being infected to being tested positive. Since the patients infected during  
140 the time  $\tau$  will not be recorded as nucleic acid positive, the diagnosed or recorded  
141 patients ( $s(t)$  above) at time  $t$  is equal to the number of infected population at time  
142  $t - \tau$ .

143 During the time  $dt$ , the number of newly infected patients  $dp(t)$  is

144 
$$dp(t) = k \cdot f(t) \cdot dt$$

145 Where  $k$  is the spreading coefficient representing the average number of people one  
146 unquarantined patient can infect in a unit interval, and  $f(t)$  is the number of  
147 unquarantined patients at time  $t$ .  $f(t)$  is equal to  $p(t)$  subtracted by the number of  
148 quarantined patients  $q(t)$ :

149 
$$f(t) = p(t) - q(t)$$

150 We further assume that  $q(t)$  (including both nucleic acid positive patients and their

151 close contacts) is proportional to  $s(t)$ , and let  $u$  be the average quarantine ratio:

152 
$$q(t) = u \cdot s(t) = u \cdot p(t - \tau)$$

153 Therefore, we get the final differential equation:

154 
$$\frac{dp(t)}{dt} = k \cdot f(t) = k \cdot [p(t) - q(t)] = k \cdot [p(t) - u \cdot p(t - \tau)]$$

155 In this equation, there are three unknown parameters: the average spreading coefficient

156  $k$ , the average quarantine ratio  $u$ , and the average detection interval  $\tau$ . These

157 parameters may vary during different periods, *e.g.*, before or after the city lockdown.

158 Using the number of reported cases during a particular time in Shanghai, these three

159 parameters can be estimated by data fitting. As a next step, we could forecast the trend

160 of Omicron spreading in Shanghai with these estimated parameters.

161

## 162 **Additional information**

163 This manuscript/model was submitted to on-line preprint server

164 (<https://www.medrxiv.org>) on 12 Apr (using infection data available up to 11 Apr). Now,

165 on the eve of our latest submission to Nature on 19 Apr, we can check the real-life

166 infection against our prediction. As shown in **Supplementary Table 2** and **Fig. 4**, the

167 actual turning point is on 13 Apr and the date when the total infection number exceeded

168 300,000 is on 14 Apr, perfect matches to our mathematical description/prediction.

169

## 170 **Acknowledgements**

171 This work was supported by research grants 81970132, 81770142, 81800144,

172 31800642, 82100153 and 82104582 from National Natural Science Foundation of



173 China, a research grant 20JC1410600 from Shanghai Science and Technology  
174 Committee, Shanghai Guangci Translational Medical Research Development  
175 Foundation, a research grant 20152504 from “Shanghai Municipal Education  
176 Commission—Gaofeng Clinical Medicine Grant Support”, “The Program for Professor  
177 of Special Appointment (Eastern Scholar) at Shanghai Institute of Higher Learning”,  
178 Samuel Waxman Cancer Research Foundation. We thank Professor Zhu Chen,  
179 Shanghai Institute of Hematology, for his kind support of this work.

180

#### 181 **Author contributions**

182 Conceived and designed the experiments: GM and GW. Performed the experiments:  
183 MJ. Analyzed the data, preparation of figures manuscripts and wrote the paper: MJ,  
184 GM, GW. Project supervision: GM. All authors read and approved the final manuscript.

185

#### 186 **Compliance with ethics guidelines**

#### 187 **Conflict of interest**

188 This article does not contain any studies with human or animal subjects. The authors  
189 declare no competing interests.

190

#### 191 **References**

- 192 1 Team, C. C.-R. SARS-CoV-2 B.1.1.529 (Omicron) Variant - United States,  
193 December 1-8, 2021. *MMWR Morb Mortal Wkly Rep* **70**, 1731-1734,  
194 doi:10.15585/mmwr.mm7050e1 (2021).
- 195 2 Karim, S. S. A. & Karim, Q. A. Omicron SARS-CoV-2 variant: a new chapter  
196 in the COVID-19 pandemic. *Lancet* **398**, 2126-2128, doi:10.1016/S0140-

- 197 6736(21)02758-6 (2021).  
198 3 Del Rio, C., Omer, S. B. & Malani, P. N. Winter of Omicron-The Evolving  
199 COVID-19 Pandemic. *JAMA* **327**, 319-320, doi:10.1001/jama.2021.24315  
200 (2022).  
201 4 Griffin, D. O. *et al.* The Importance of Understanding the Stages of COVID-19  
202 in Treatment and Trials. *AIDS Rev* **23**, 40-47,  
203 doi:10.24875/AIDSRev.200001261 (2021).  
204 5 Peeling, R. W., Heymann, D. L., Teo, Y. Y. & Garcia, P. J. Diagnostics for  
205 COVID-19: moving from pandemic response to control. *Lancet* **399**, 757-768,  
206 doi:10.1016/S0140-6736(21)02346-1 (2022).  
207 6 He, X. *et al.* Temporal dynamics in viral shedding and transmissibility of  
208 COVID-19. *Nat Med* **26**, 672-675, doi:10.1038/s41591-020-0869-5 (2020).

209

## 210 **Figure legends**

211 **Figure 1.** The schematic diagram of our model. Three parameters were taken into  
212 account, the test interval  $\tau$ , the spreading coefficient  $k$  and the quarantine ratio  $u$ .

213 **Figure 2.** Data fitting. The data were fitted separately before and after the lockdown.  
214 The blue points and curve represented the reported number of total confirmed cases,  
215 and the yellow ones represented the number calculated from our differential equation.  
216 The parameters were rounded to 3 significant digits.

217 **Figure 3.** Epidemic trend forecast. **a**, The forecasted total number of confirmed cases,  
218 with the predicted data points colored in blue. **b**, The reported daily increased number  
219 of cases (red) and those for upcoming days predicted by our model (blue).

220 **Figure 4.** The number of infected cases per day. The dashed line represented the moving  
221 averaged number of real cases while the solid line represented the number of real cases.  
222 The actual and predicted turning point were represented by the vertical dashed line  
223 and the rectangle above the curves.

224

225 **Extended Data**

226 **Figure 1.** The total number of confirmed cases in Shanghai since March1. The blue  
227 points and curve represent the data before the official lockdown, and the red ones  
228 represent the data after the lockdown.

229 **Supplementary Table 1.** The number of predicted and real infected cases.

230 **Supplementary Table 2.** The number of COVID-19 cases in Shanghai.

231

Fig. 1 Jiang et al. 2022

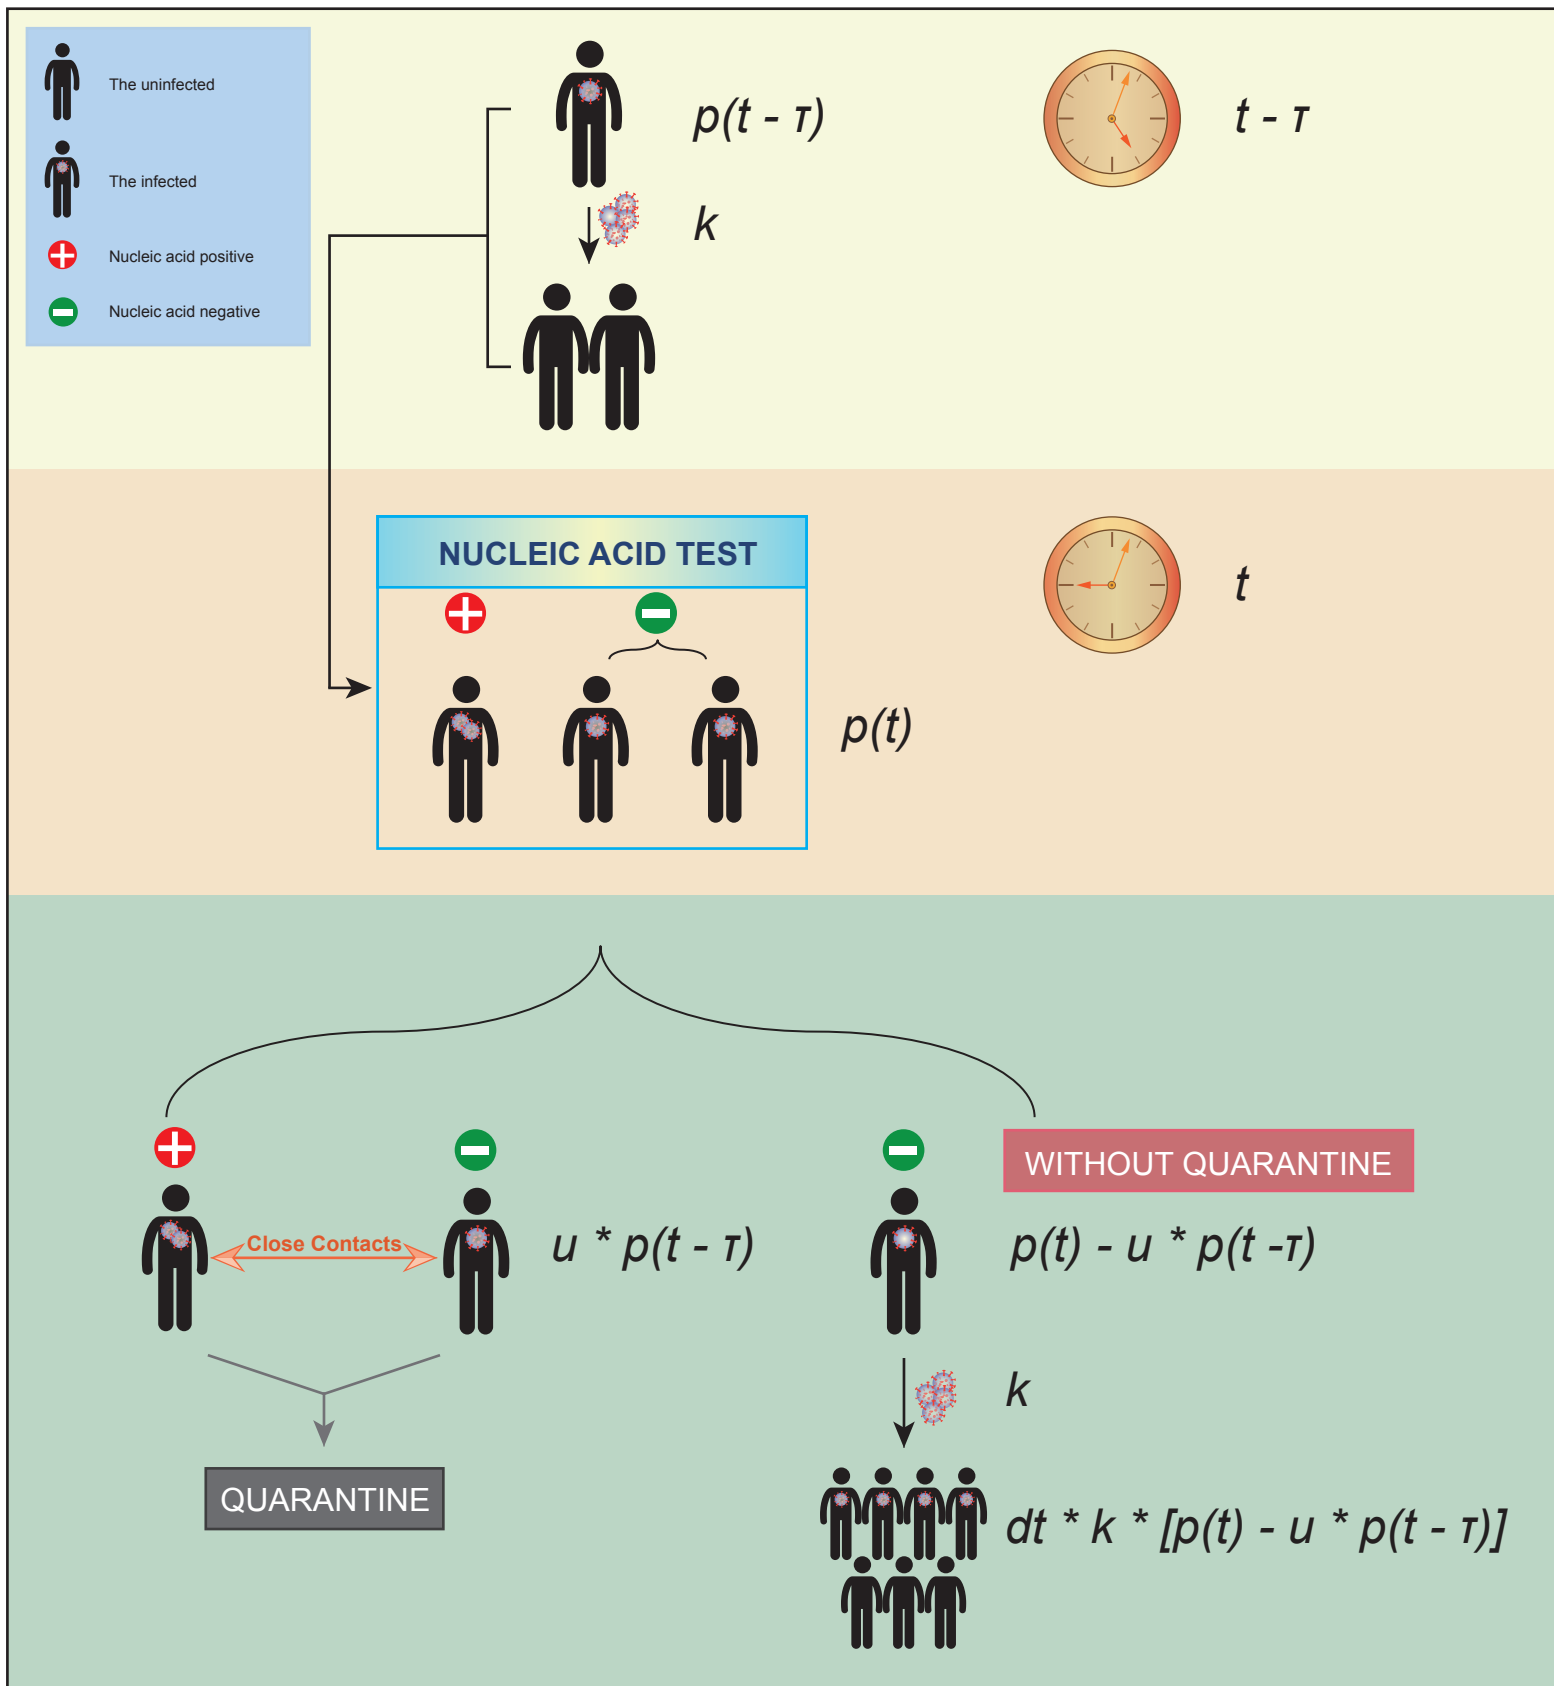

## Shanghai Model (2022)

$$dp(t)/dt = k * [p(t) - u * p(t - \tau)]$$

Fig. 2 Jiang et al. 2022

The number of COVID-19 cases detected in Shanghai before lockdown

$k = 1.63, u = 1.32$

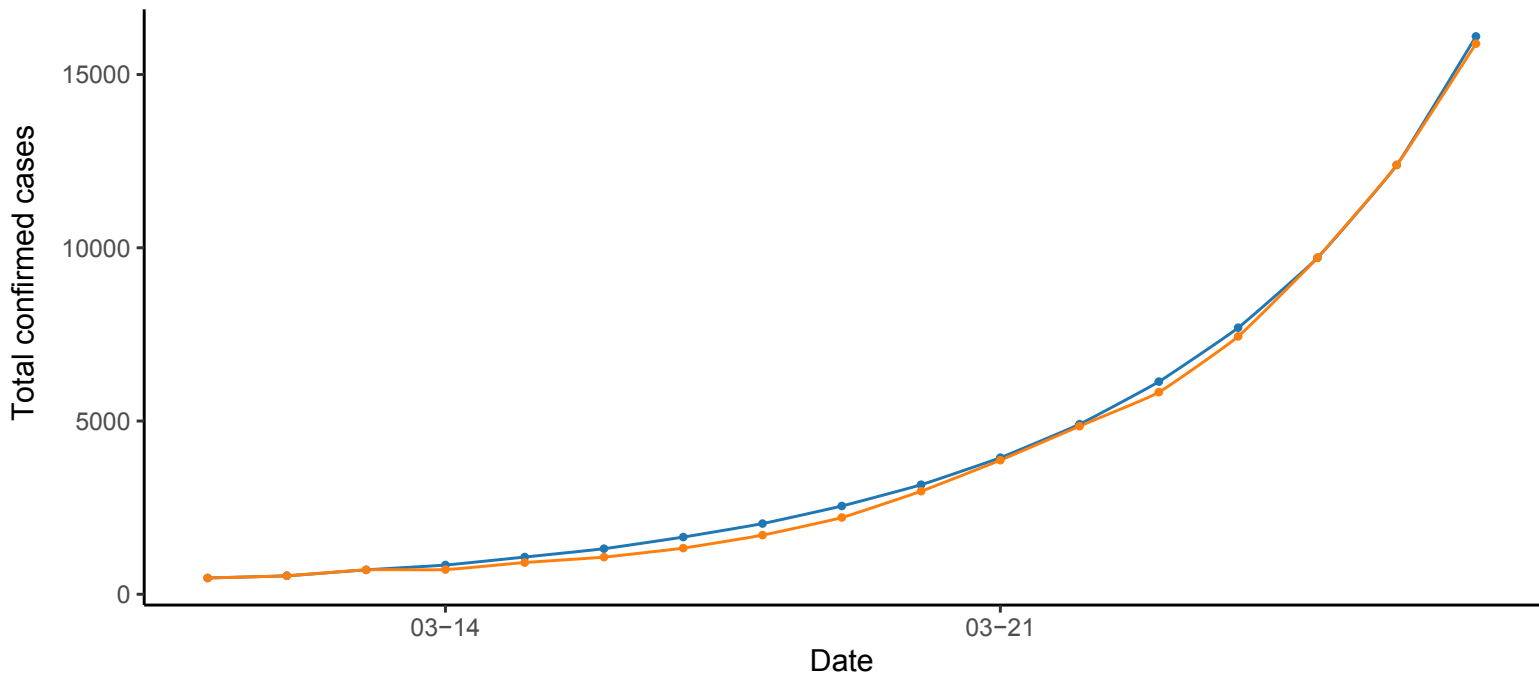

The number of COVID-19 cases detected in Shanghai after lockdown

$k = 1.49, u = 1.04$

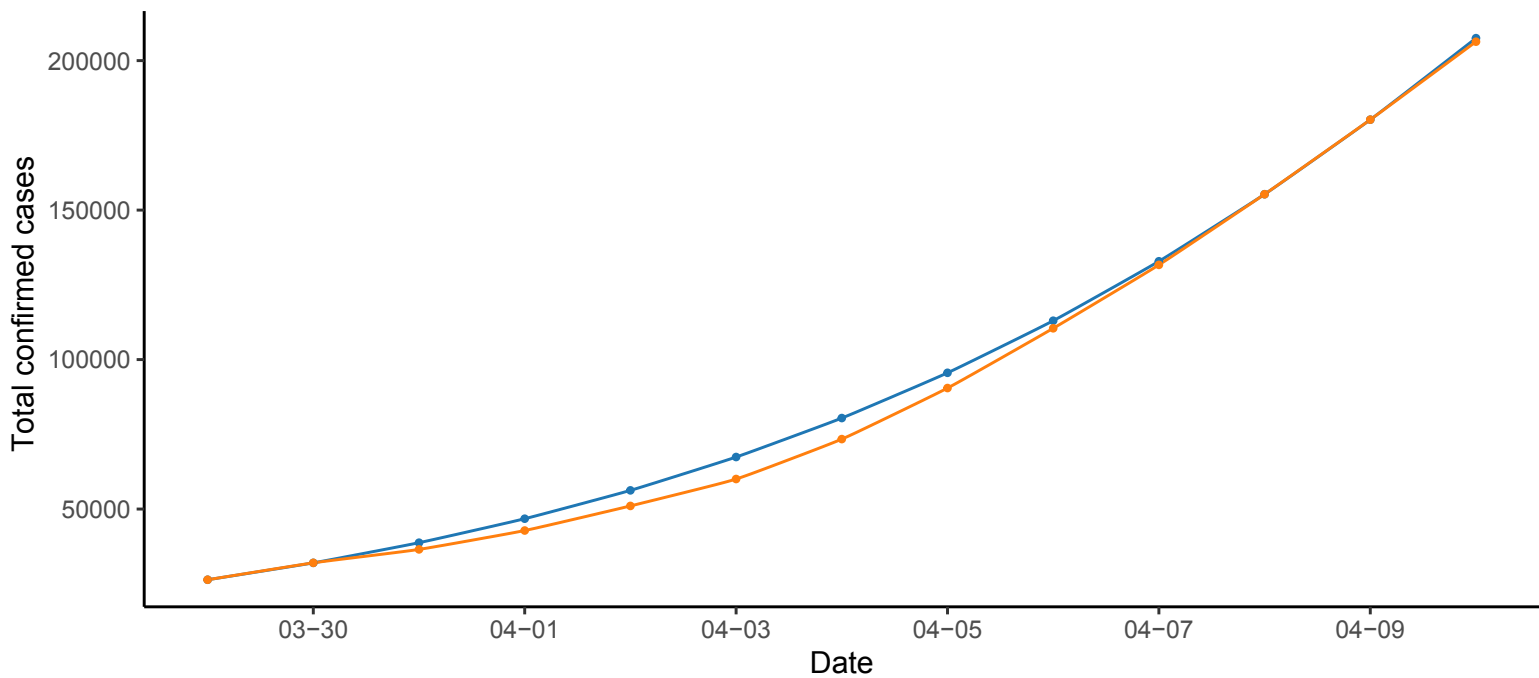

Type — predicted — real

A

The predicted number of COVID-19 cases in Shanghai

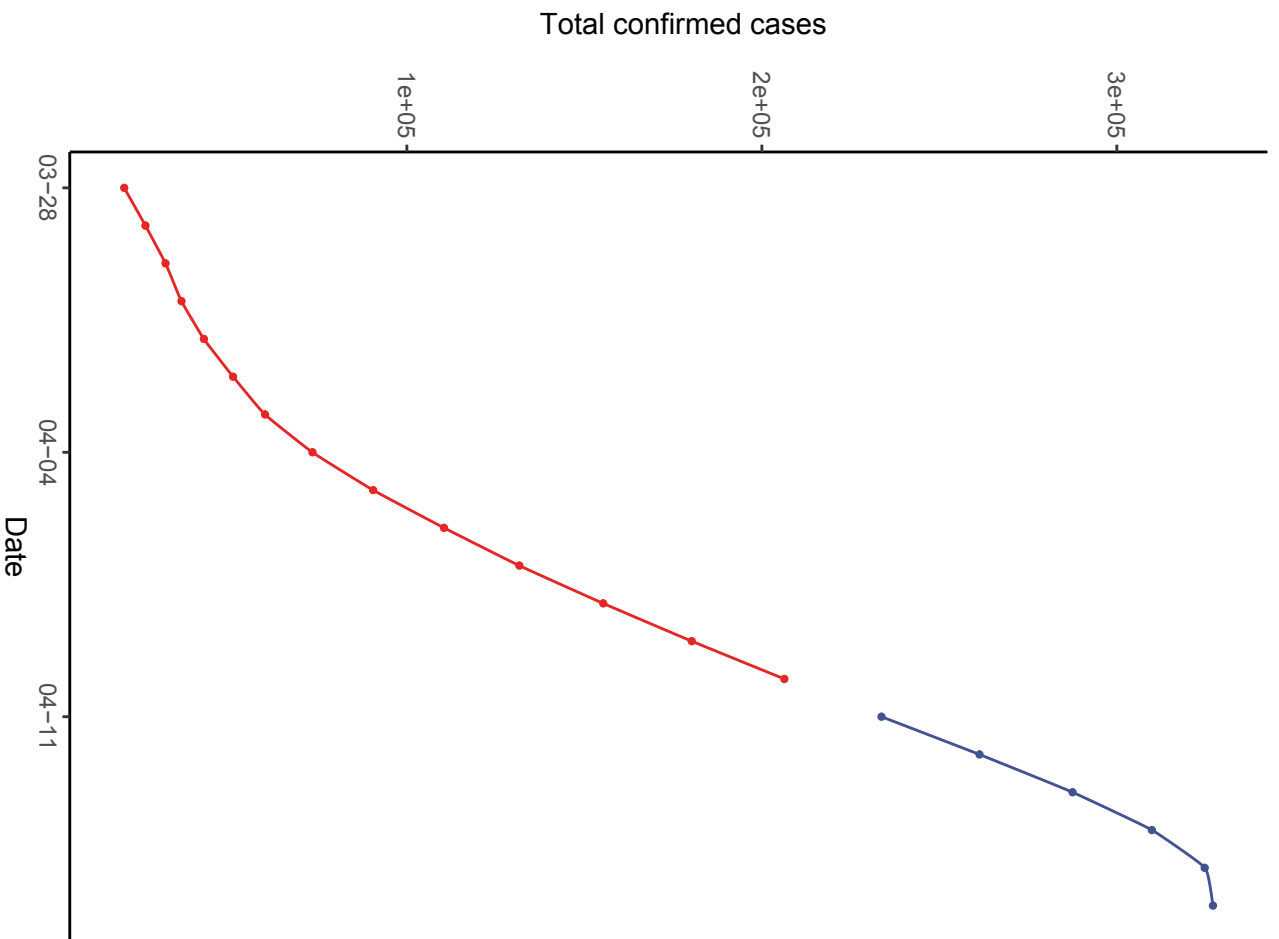

B

Daily reported number of cases

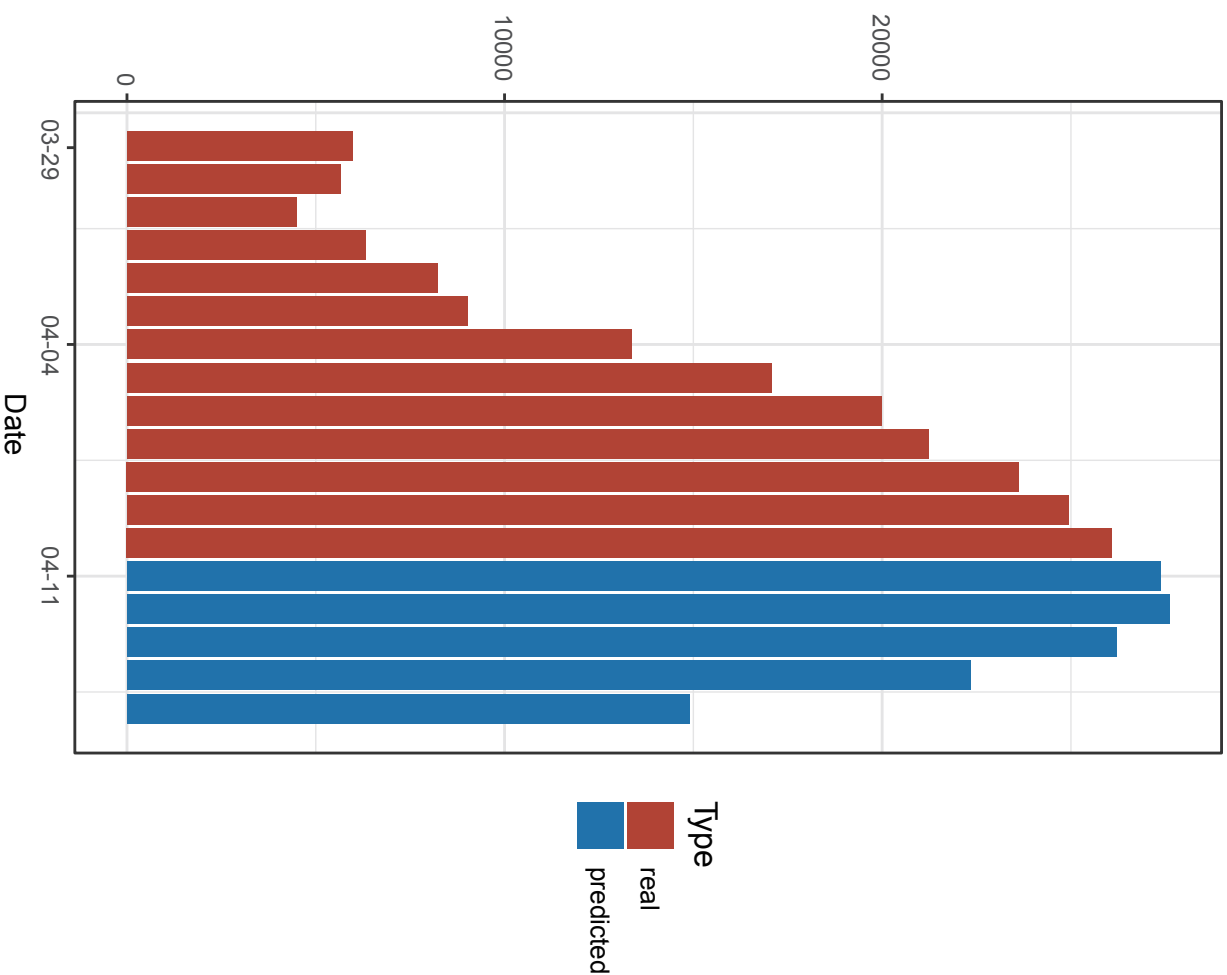

Fig. 4 Jiang et al. 2022

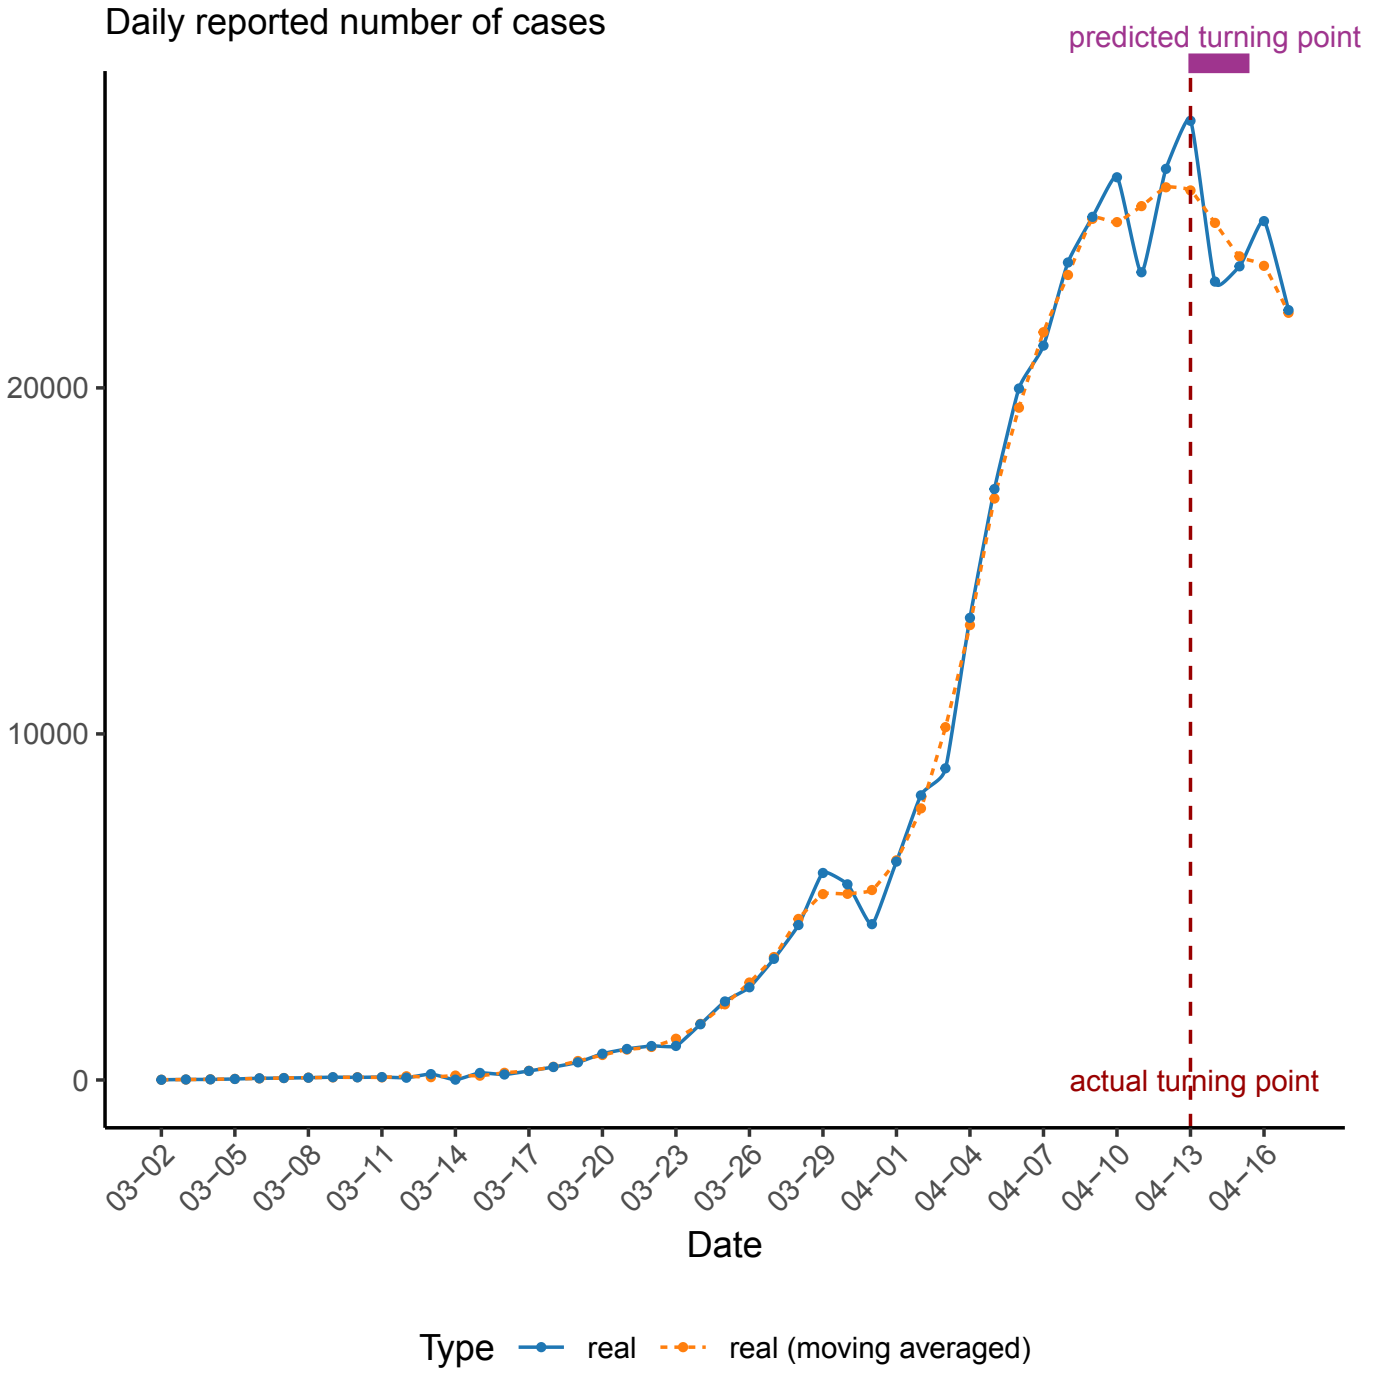

## Extended Data Fig. 1 Jiang et al. 2022

### The number of COVID-19 cases detected in Shanghai

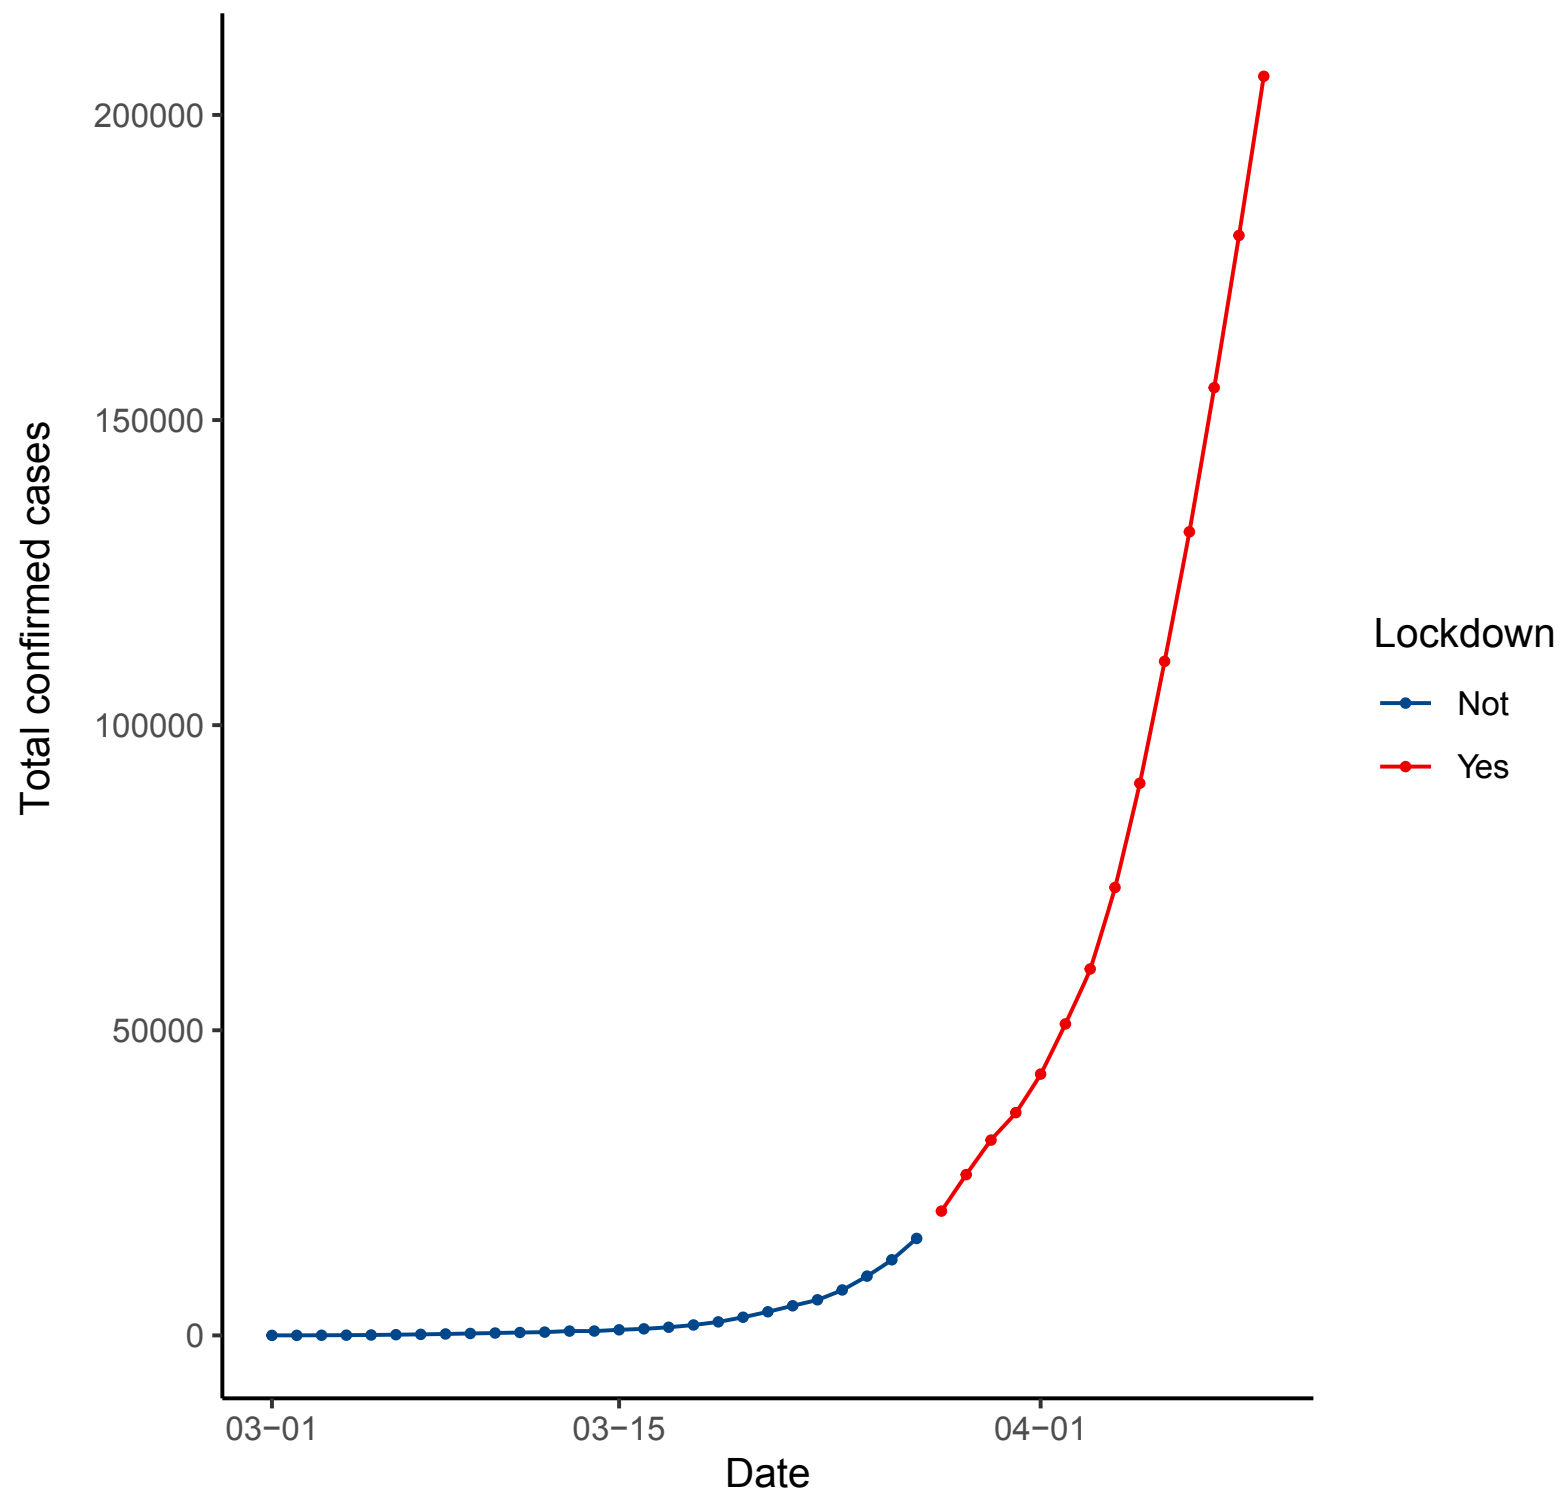



**Supplementary Table 1. The number of predicted and real infected cases.**

| predicted | real total infected | real daily reported | real total infected (*) | real daily reported (*) | date |
|-----------|---------------------|---------------------|-------------------------|-------------------------|------|
| 233705.4  | 229678              | 26330               | 230672                  | 25253                   | 4/11 |
| 261313.8  | 256008              | 27719               | 256469                  | 25797                   | 4/12 |
| 287521    | 283727              | 23072               | 282176                  | 25707                   | 4/13 |
| 309862.9  | 306799              | 23513               | 306944                  | 24768                   | 4/14 |
| 324750.5  | 330312              | 24820               | 330745                  | 23801                   | 4/15 |
| 327074    | 355132              | 22248               | 354272                  | 23527                   | 4/16 |
|           | 377380              |                     | 376442                  | 22170                   | 4/17 |

\*These numbers were moving averaged

**Supplementary Table 2. The number of COVID-19 cases in Shanghai**

| Daily infected (*) | Total infected (*) | Date |
|--------------------|--------------------|------|
| 1                  | 1                  | 3/1  |
| 5                  | 6                  | 3/2  |
| 14                 | 20                 | 3/3  |
| 16                 | 36                 | 3/4  |
| 28                 | 64                 | 3/5  |
| 48                 | 112                | 3/6  |
| 55                 | 167                | 3/7  |
| 65                 | 232                | 3/8  |
| 80                 | 312                | 3/9  |
| 75                 | 387                | 3/10 |
| 83                 | 470                | 3/11 |
| 65                 | 535                | 3/12 |
| 169                | 704                | 3/13 |
| 9                  | 713                | 3/14 |
| 202                | 915                | 3/15 |
| 158                | 1073               | 3/16 |
| 260                | 1333               | 3/17 |
| 374                | 1707               | 3/18 |
| 509                | 2216               | 3/19 |
| 758                | 2974               | 3/20 |
| 896                | 3870               | 3/21 |
| 981                | 4851               | 3/22 |
| 983                | 5834               | 3/23 |
| 1609               | 7443               | 3/24 |
| 2269               | 9712               | 3/25 |
| 2678               | 12390              | 3/26 |
| 3500               | 15890              | 3/27 |
| 4477               | 20367              | 3/28 |
| 5982               | 26349              | 3/29 |
| 5653               | 32002              | 3/30 |
| 4502               | 36504              | 3/31 |
| 6311               | 42815              | 4/1  |
| 8226               | 51041              | 4/2  |
| 9006               | 60047              | 4/3  |
| 13354              | 73401              | 4/4  |
| 17077              | 90478              | 4/5  |
| 19982              | 110460             | 4/6  |
| 21222              | 131682             | 4/7  |
| 23624              | 155306             | 4/8  |
| 24943              | 180249             | 4/9  |
| 26087              | 206336             | 4/10 |

\* Data source: Shanghai Municipal Health Commission (<https://wsjkw.sh.gov.cn/xwfb/index.html>) and Global Times (<https://www.huanqiu.com>)
